# Supplementary material for: Light and magnetism dual-gated photoinduced electron transfer-reversible addition–fragmentation chain transfer (PET-RAFT) polymerization
Source: Royal Society of Chemistry journal article supplement (doi:10.1039/d0ra00401d), 2020-01-01
Supplement: d0ra00401d1.pdf [file d0ra00401d1.pdf]

## ***Supplementary Information***

### **Light and Magnetism Dual Stimuli-Responsive Photoinduced Electron Transfer-Reversible Addition–Fragmentation Chain Transfer (PET-RAFT) Polymerization**

Lingjuan Hu,<sup>§</sup> Qi Wang,<sup>§</sup> Xiaomeng Zhang, Haitao Zhao, Zhe Cui, Peng Fu, Mingying  
Liu, Xinchang Pang\* and Xiaoguang Qiao\*

Henan Joint International Research Laboratory of Living Polymerizations and  
Functional Nanomaterials, Henan Key Laboratory of Advanced Nylon Materials and  
Application, School of Materials Science and Engineering, Zhengzhou University,  
Zhengzhou, 450001, China

\*To whom correspondence should be addressed. <sup>§</sup>These authors contributed  
equally to this work.

Corresponding Author:

[Pangxinchang1980@163.com](mailto:Pangxinchang1980@163.com)

[joexiaoguang@hotmail.com](mailto:joexiaoguang@hotmail.com)

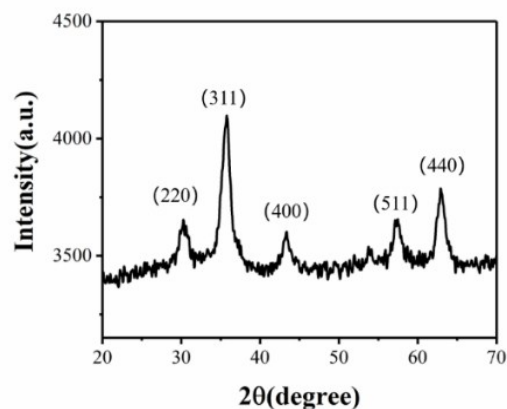

**Figure S1.** The XRD patterns of superparamagnetic  $\gamma\text{-Fe}_2\text{O}_3$  nanoparticles.

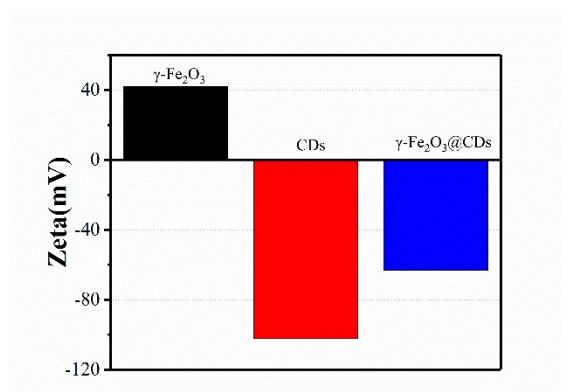

**Figure S2.**  $\zeta$  Potential of  $\gamma\text{-Fe}_2\text{O}_3$ , CDs and  $\gamma\text{-Fe}_2\text{O}_3$ @CDs nanoparticles, respectively.

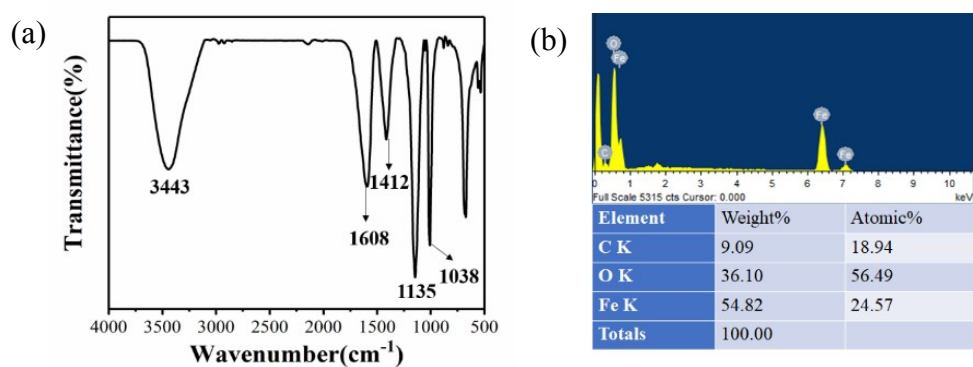

**Figure S3.** FTIR spectra and the EDS analysis of superparamagnetic  $\gamma\text{-Fe}_2\text{O}_3$ @CDs nanoparticles.

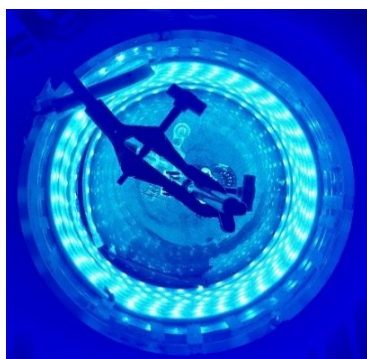

**Figure S4.** Representative photograph composed of reaction vial surrounded by the blue LEDs (A small fan was used to continuously blow air into the reaction system to fully dissipate the heat to maintain the reaction temperature at room temperature.).

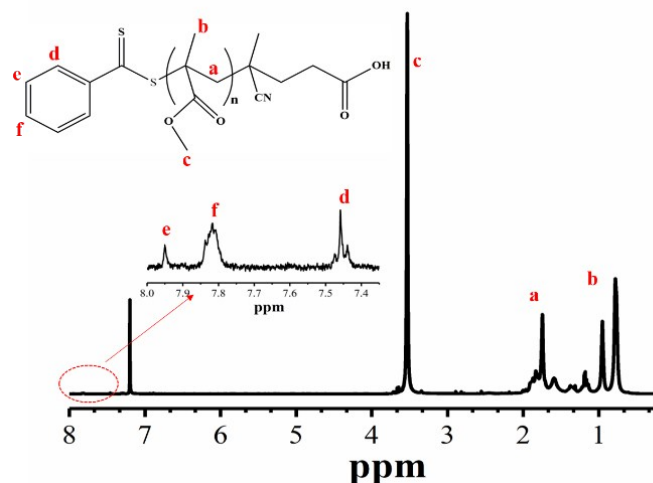

**Figure S5.**  $^1\text{H}$ -NMR (300MHz,  $\text{CDCl}_3$ ) of PMMA synthesized by PET-RAFT polymerization using  $\gamma\text{-Fe}_2\text{O}_3@\text{CDs}$  nanoparticles as photoredox catalyst.

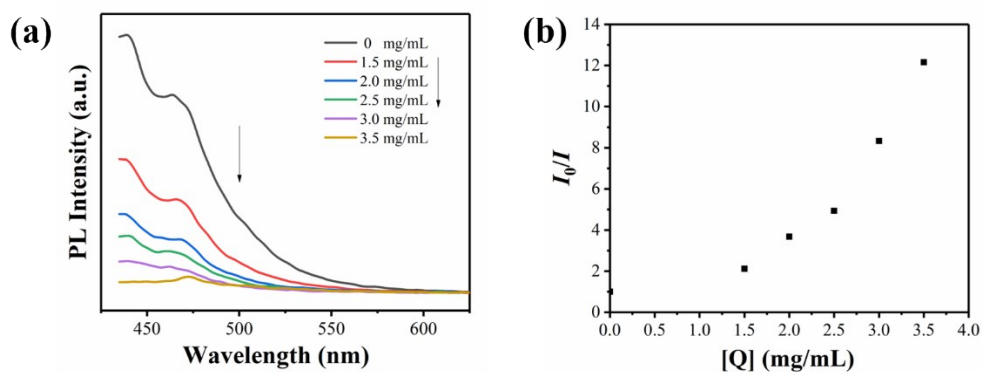

**Figure S6.** Fluorescence quenching study of  $\gamma\text{-Fe}_2\text{O}_3@\text{CDs}$  solution (10mg/mL) in DMSO with varying concentration of CPADB: (a) fluorescent emission intensity versus

different concentrations of CPADB; (b) plots of ratio  $I_0/I$  versus CPADB concentration.  $I_0$  and  $I$  represent the emission intensity in the absence and presence of CPADB, respectively.

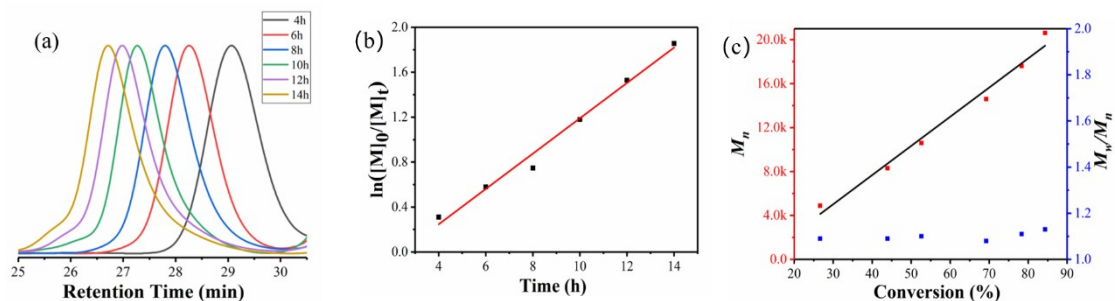

**Figure S7.** PET-RAFT polymerization of MA catalyzed by  $\gamma\text{-Fe}_2\text{O}_3@\text{CDs}$  under blue LED irradiation in DMSO at 25°C under blue LED irradiation (6 W,  $\lambda_{\text{max}} = 460$  nm, 2 mW/cm<sup>2</sup>) with CDTPA as the CTA ([MA]/[CDTPA] = 200: 1). (a) GPC traces in the kinetic study of PMA synthesized *via* PET-RAFT polymerization. (b) Plot of  $\ln([M]_0/[M]_t)$  versus exposure time  $t$ . (c) Number-average molecular weight ( $M_n$ ) and polydispersity index (PDI) of PMA synthesized in the kinetic study.

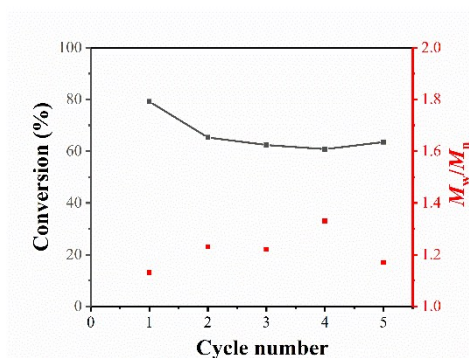

**Figure S8.** The average polymerization yields and polydispersity index (PDI) of PMMA after each PET-RAFT polymerization.
